# Supplementary material for: Synthesis, characterization and properties of a bio-based elastomer: polymyrcene
Source: Royal Society of Chemistry journal article supplement (doi:10.1039/c4ra09475a), 2014-01-01
Supplement: c4ra09475a1.pdf [file c4ra09475a1.pdf]

## Supplementary Information

# Synthesis, characterization and properties of a bio-based elastomer: Polymyrcene

Preetom Sarkar, Anil K. Bhowmick\*

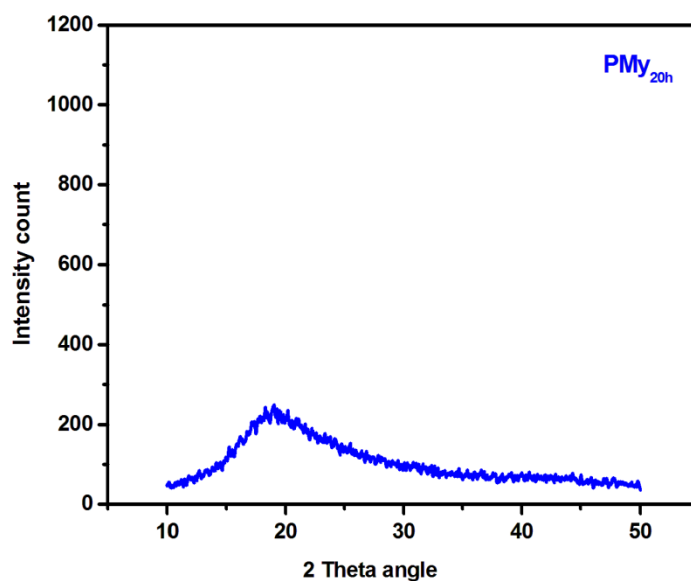

Fig. S1: X-ray diffractogram of synthesised PMy<sub>20h</sub>

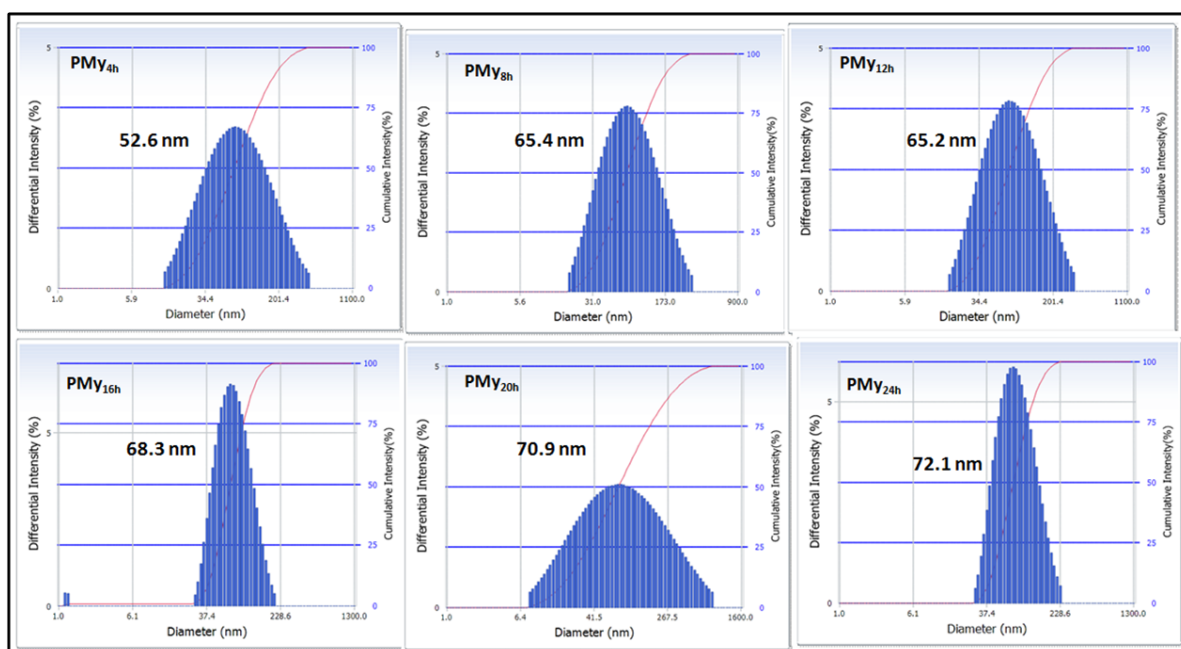

Fig. S2: Particle size distribution of persulfate initiated polymyrcene latex

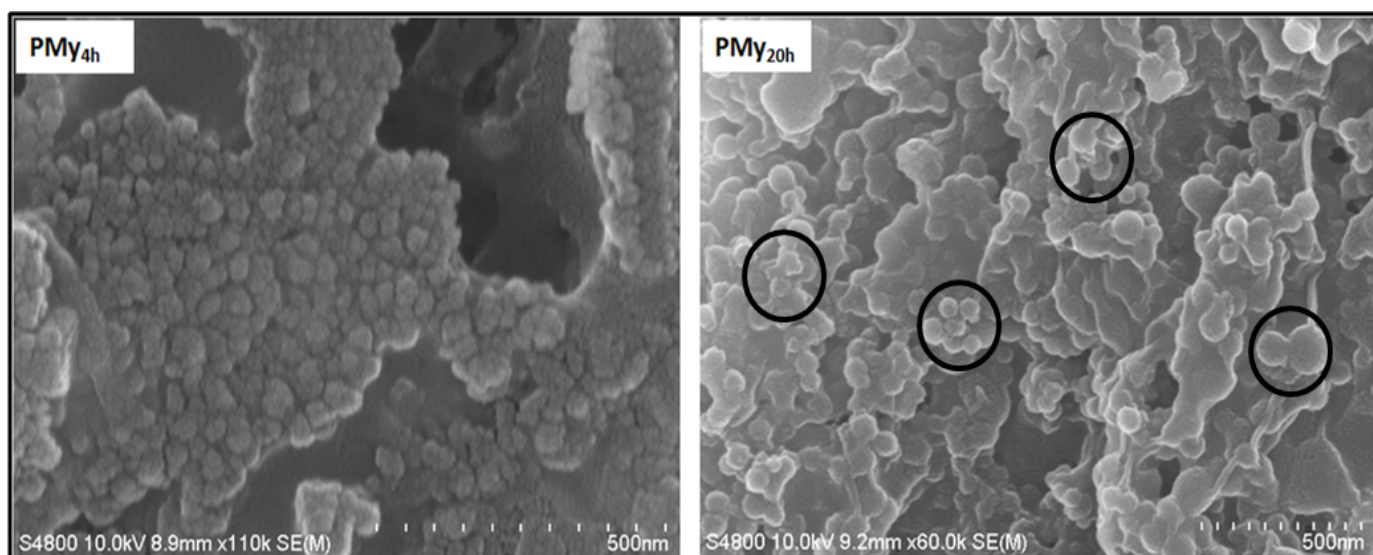

**Fig. S3:** FESEM images of persulfate initiated polymyrcene latex
